# Supplementary material
Source: PubMed Central journal article supplement (PMC2929118)
Supplement: tpc.109.073189_1.pdf [file tpc.109.073189_1.pdf]

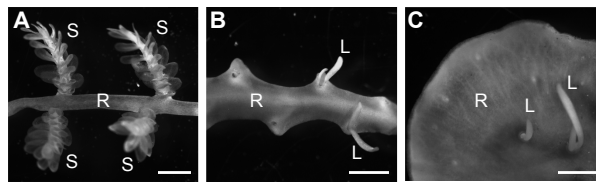

**Supplemental Figure 1.** Morphology of Podostemaceae.

(A–C) Light micrographs of *Terniopsis brevis* (A), *Cladopus doianus* (B), and *Hydrobryum japonicum* (C).

(A) Shoot (S) arising from the lateral side of the subcylindrical root (R) of *T. brevis*.

(B) Leaves (L) arising near the lateral side of the ribbonlike root (R) of *C. doianus*.

(C) Leaves (L) arising from the dorsal surface of the crustose root (R) of *H. japonicum*.

L, leaf; R, root; S, shoot. Bars = 1 mm.

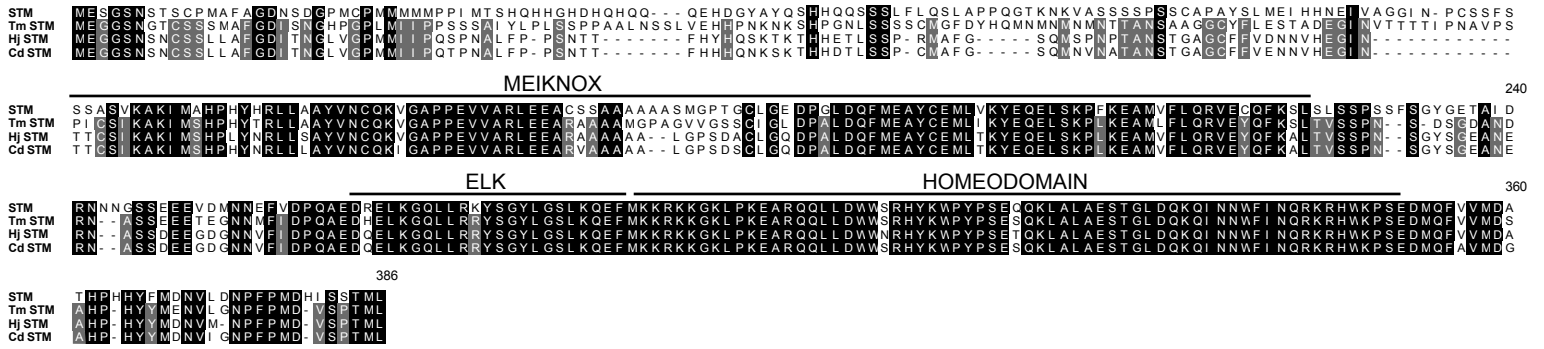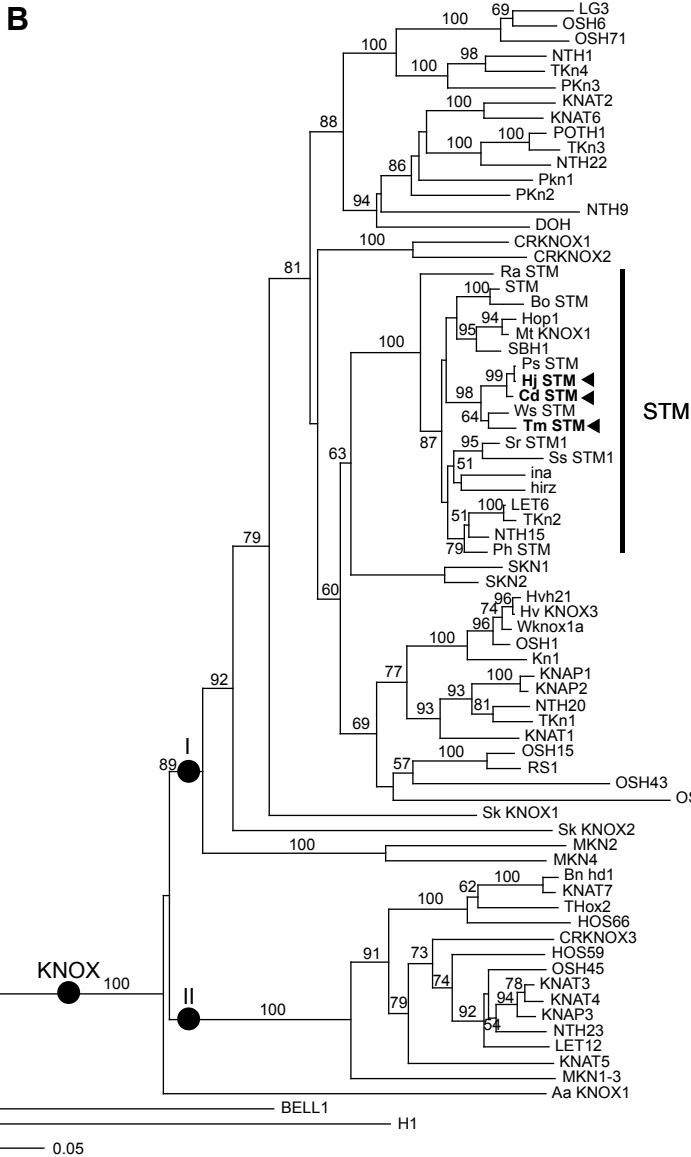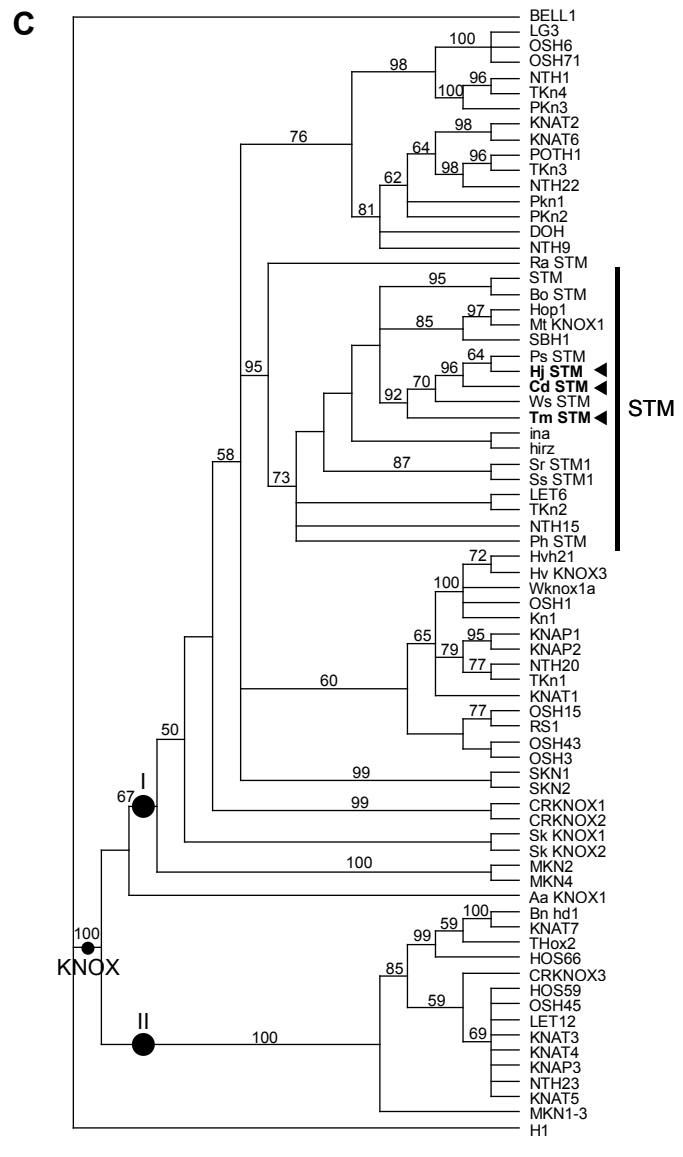

**Supplemental Figure 2. Structure and Phylogeny of Podostemaceae STM Genes.**

(A) Alignment of inferred amino acids of Tm STM, HJ STM and Cd STM to those of *Arabidopsis thaliana* STM. Identical residues are shaded (black boxes highlight invariant amino acids, and gray boxes show conserved amino acids among Podostemaceae STMs), and dashed lines are added to maximize alignment. Horizontal lines show conserved domains, i.e., MEINOX domain, ELK domain and homeodomain.

(B) Neighbor Joining tree of KNOX genes using amino acid sequences of three conserved domains (Supplemental Dataset 1). Podostemaceae STM genes are marked by arrowheads. Bootstrap values (>50%) are indicated above branches. Bar indicates 0.05 amino acid substitutions per site.

(C) Strict consensus of the 4611 Most Parsimonious trees using amino acid sequences of three conserved domains (Supplemental Dataset 1). Podostemaceae STM genes are marked by arrowheads. Bootstrap values (>50%) are indicated above branches.

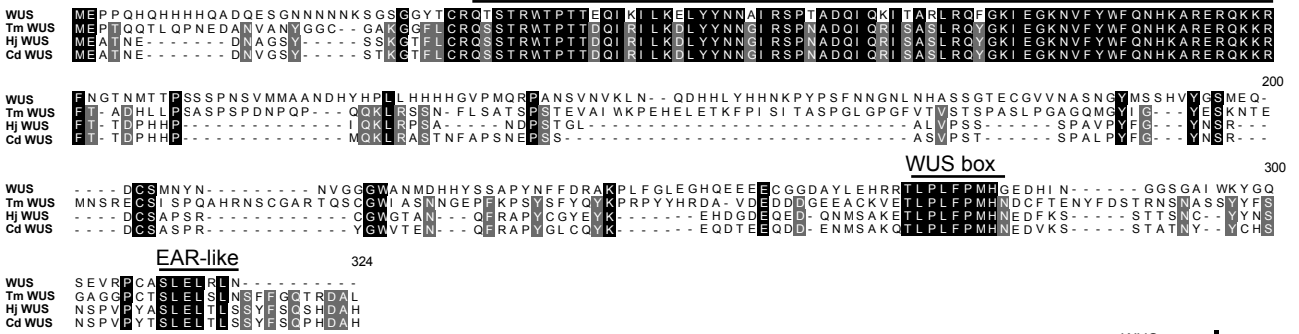

**B**

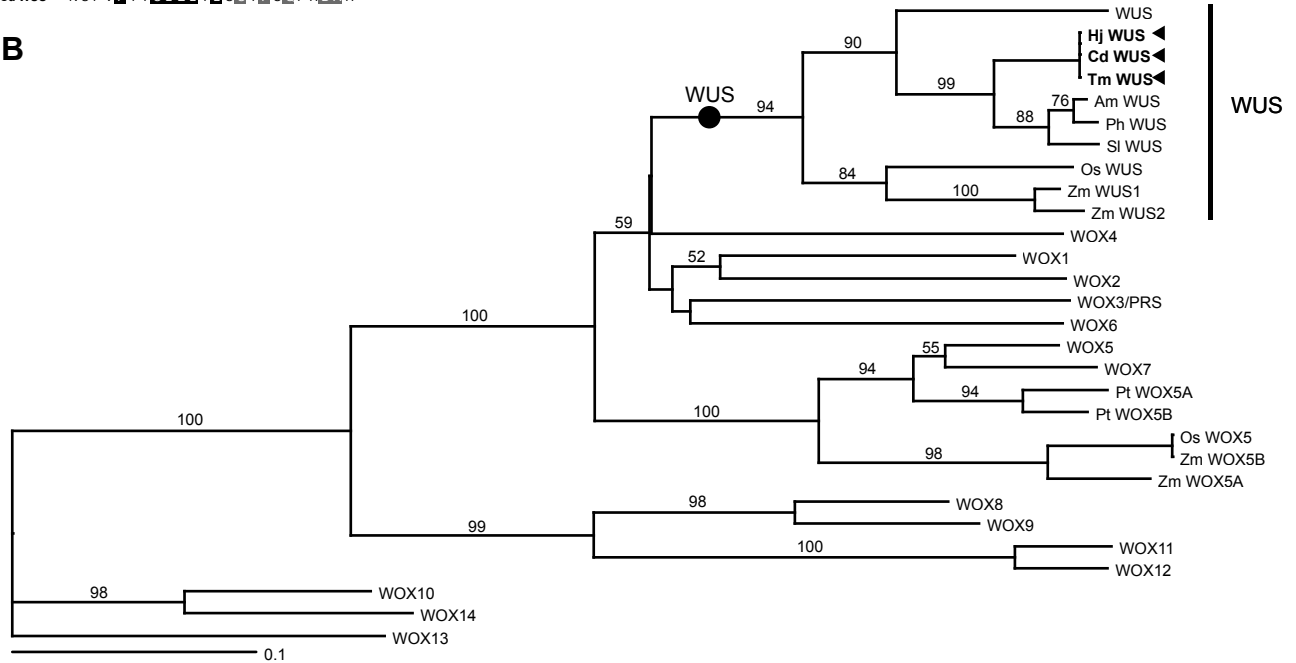

**C**

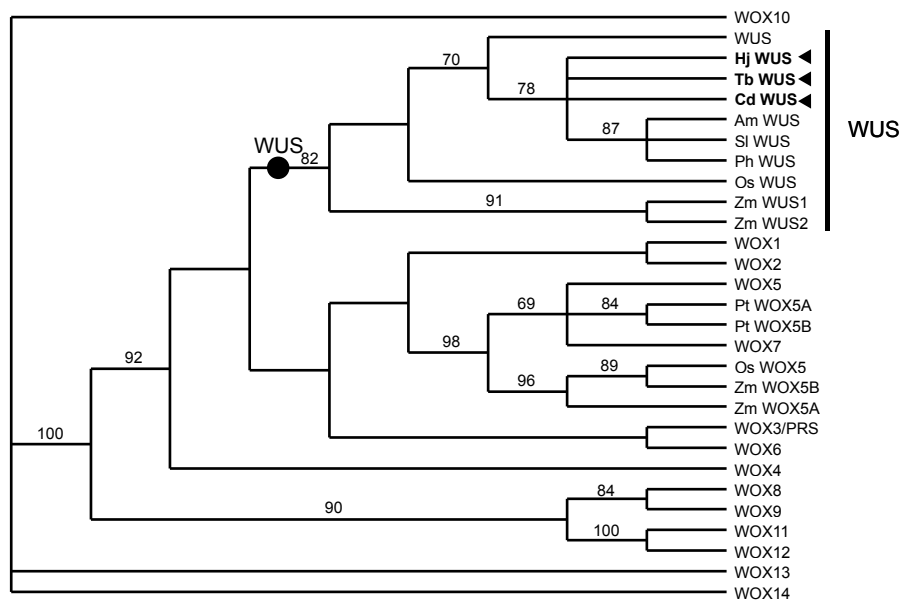

**Supplemental Figure 3. Structure and Phylogeny of Podostemaceae WUS Genes.**

(A) Alignment of inferred amino acids of Tm *WUS*, Hj *WUS* and Cd *WUS* to those of *Arabidopsis thaliana* *WUS*. Black boxes highlight invariant amino acids and gray boxes show conserved amino acids among Podostemaceae *WUS* genes. Dashed lines are added to maximize alignment. Horizontal lines show conserved domains, homeodomain, WUS box and EAR-like domain, which characterize *WUS* genes.

(B) Neighbor Joining tree of *WOX* family genes based on amino acid sequences of Homeodomain (Supplemental Dataset 2). Podostemaceae *WUS* genes are marked by arrowheads. Bootstrap values (>50%) are indicated above branches. Bar indicates 0.1 amino acid substitutions per site.

(C) Strict consensus of the 12 Most Parsimonious trees of *WOX* family genes based on amino acid sequences of Homeodomain (Supplemental Dataset 2). Podostemaceae *WOX* genes are marked by arrowheads. Bootstrap values (>50%) are indicated above branches.

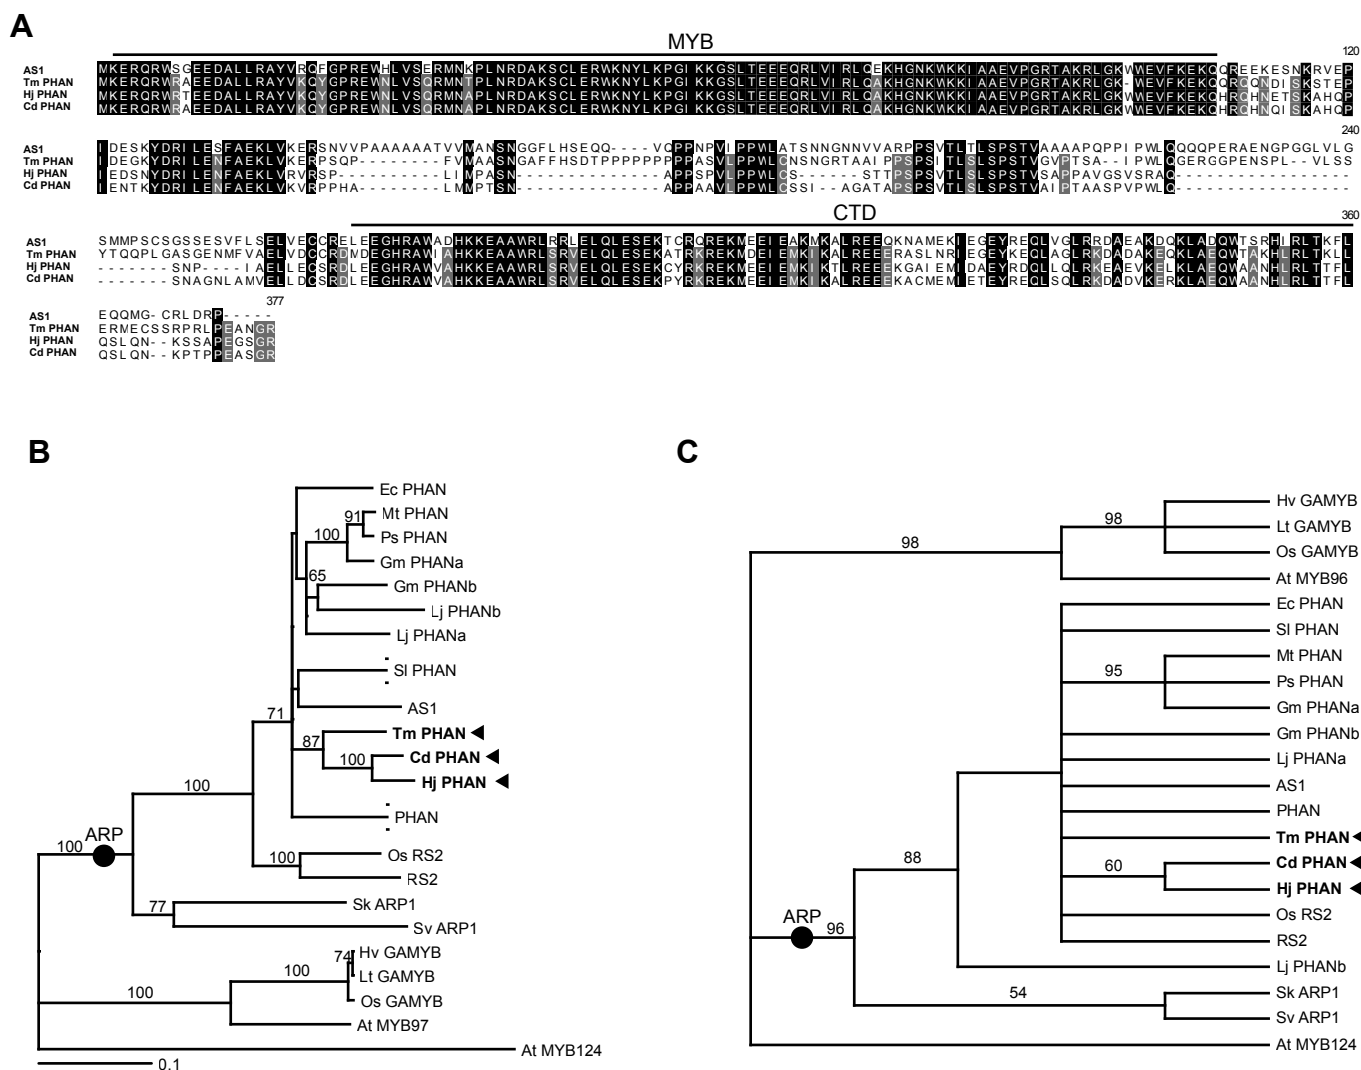

**Supplemental Figure 4. Structure and Phylogeny of Podostemaceae *ARP* Genes.**

(A) Alignment of inferred amino acids of *TmPHAN*, *HjPHAN* and *CdPHAN* to those of *A. thaliana ASI*. Black boxes highlight invariant amino acids, and gray boxes show conserved amino acids among Podostemaceae *ARP* genes. Dashed lines are added to maximize alignment. Horizontal lines show conserved MYB and CTD domains.

(B) Neighbor Joining tree of *ARP* genes based on amino acid sequences of conserved MYB domains (Supplemental Dataset 3). Podostemaceae *ARP* genes are marked by arrowheads. Bootstrap values (>50%) are indicated above branches. Bar indicates 0.1 amino acid substitutions per site.

(C) Strict consensus of the 195 Most Parsimonious trees of *ARP* genes based on amino acid sequences of conserved MYB domains (Supplemental Dataset 3). Podostemaceae *ARP* genes are marked by arrowheads. Bootstrap values (>50%) are indicated above branches.

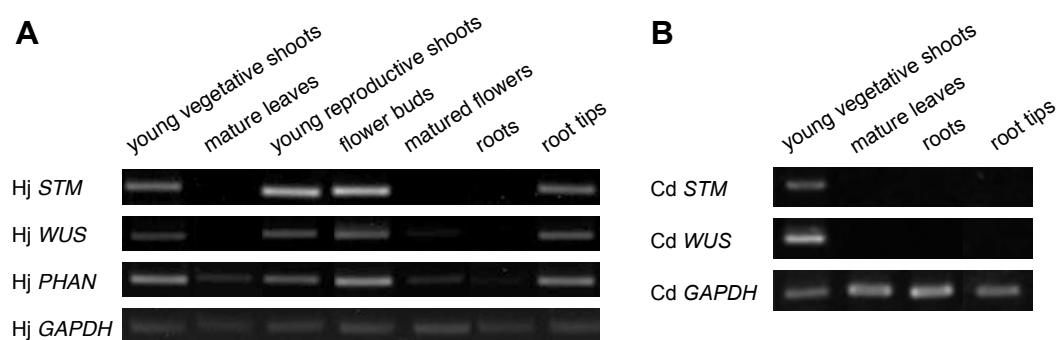

**Supplemental Figure 5. Results of RT-PCR analyses of gene expression in different organs of *Hydrobryum japonicum*, and *Cladopus doianus*.**

(A) Hj *STM*, Hj *WUS*, and Hj *PHAN* expression in *H. japonicum*. Total RNA was extracted from several kinds of organs (young vegetative shoots, mature leaves, young reproductive shoots, flower buds, mature flowers, roots, and root tips). Transcripts were amplified by 32 cycles of PCR with gene-specific primers. Similar results were obtained from two biological replicates. The expression of Hj *GAPDH* was used as a control.

(B) Cd *STM* and Cd *WUS* expressions in *C. doianus*. Total RNA was extracted from several kinds of organs (young vegetative shoots, mature leaves, roots, and root tips). Transcripts were amplified by 40 cycles of PCR with gene-specific primers. Similar results were obtained from two biological replicates. The expression of Cd *STM* or Cd *WUS* was weakly detected from the root tips or mature leaves in replicated experiment. The expression of Cd *GAPDH* was used as a control.

Supplemental Table 1. Organs Contained in Samples Used in RT-PCR Analysis.

| Sample                    | Contained organ | Leaf    | Shoot apex | Bract | Floral organ | Root |
|---------------------------|-----------------|---------|------------|-------|--------------|------|
| Young vegetative shoots   |                 | +       | +          | -     | -            | +    |
| Mature leaves             |                 | +       | -          | -     | -            | -    |
| Young reproductive shoots |                 | -       | +          | +     | -            | +    |
| Floral buds               |                 | -       | +          | +     | +            | +    |
| Mature flowers            |                 | -       | +          | +     | +            | -    |
| Roots                     |                 | -       | -          | -     | -            | +    |
| Root tips                 |                 | - or +* | - or +*    | -     | -            | +    |

\*Dessected samples of root tips may include leaf and shoot apex, because a new vegetative shoot arises in close proximity to the root meristem.

Supplemental Table 2. Sample Collection Sites.

| Species                     | Collection site                            |
|-----------------------------|--------------------------------------------|
| <i>Hydrobryum japonicum</i> | Ogawa River, Kagoshima Prefecture, Japan   |
| <i>Cladopus doianus</i>     | Sendai River, Kagoshima Prefecture, Japan  |
| <i>Cladopus doianus</i>     | Amori River, Kagoshima Prefecture, Japan   |
| <i>Terniopsis minor</i>     | Pong Nam Ron stream, Chanthaburi, Thailand |

Supplemental Table 3.  
GenBank Accession Numbers for Genes Isolated in This Study.

| Species                      | Gene            | Accession number |
|------------------------------|-----------------|------------------|
| <i>Hydrobryum japonicum</i>  | Hj <i>STM</i>   | AB512740         |
|                              | Hj <i>WUS</i>   | AB512741         |
|                              | Hj <i>PHAN</i>  | AB512742         |
|                              | Hj <i>GAPDH</i> | AB512750         |
| <i>Cladopus doianus</i>      | Cd <i>STM</i>   | AB512743         |
|                              | Cd <i>WUS</i>   | AB512744         |
|                              | Cd <i>PHAN</i>  | AB512745         |
|                              | Cd <i>GAPDH</i> | AB512751         |
| <i>Terniopsis minor</i>      | Tm <i>STM</i>   | AB512752         |
|                              | Tm <i>WUS</i>   | AB512753         |
|                              | Tm <i>PHAN</i>  | AB512754         |
| <i>Polyleurum stylosum</i>   | Ps <i>STM</i>   | AB512746         |
| <i>Weddellina squamulosa</i> | Ws <i>STM</i>   | AB512748         |



Supplemental Table 4. Gene Accession Numbers for *KNOX* Phylogeny.

| <b>Gene</b>     | <b>Species</b>                 | <b>Accession Number</b> |
|-----------------|--------------------------------|-------------------------|
| <i>Aa KNOX1</i> | <i>Acetabularia acetabulum</i> | AF170172                |
| <i>BELL1</i>    | <i>Arabidopsis thaliana</i>    | U39944                  |
| <i>Bn hd1</i>   | <i>Brassica napus</i>          | Z29073                  |
| <i>Bo STM</i>   | <i>Brassica oleracea</i>       | AF193813                |
| <i>CRKNOX1</i>  | <i>Ceratopteris richardii</i>  | AB043954                |
| <i>CRKNOX2</i>  | <i>Ceratopteris richardii</i>  | AB043956                |
| <i>CRKNOX3</i>  | <i>Ceratopteris richardii</i>  | AB043957                |
| <i>DOH1</i>     | <i>Dendrobium grex</i>         | AJ276389                |
| <i>H1</i>       | <i>Arabidopsis thaliana</i>    | X801227                 |
| <i>hirz</i>     | <i>Antirrhinum majus</i>       | AY072736                |
| <i>Hop1</i>     | <i>Pisum sativum</i>           | AF063307                |
| <i>HOS59</i>    | <i>Oryza sativa</i>            | AB061818                |
| <i>HOS66</i>    | <i>Oryza sativa</i>            | BAB55660                |
| <i>Hvh21</i>    | <i>Hordeum vulgare</i>         | AF022390                |
| <i>Hv KNOX3</i> | <i>Hordeum vulgare</i>         | X83518                  |
| <i>ina</i>      | <i>Antirrhinum majus</i>       | AY072735                |
| <i>Kn1</i>      | <i>Zea mays</i>                | X61308                  |
| <i>KNAP1</i>    | <i>Malus domestica</i>         | Z71978                  |
| <i>KNAP2</i>    | <i>Malus domestica</i>         | Z71979                  |
| <i>KNAP3</i>    | <i>Malus domestica</i>         | Z71980                  |
| <i>KNAT1</i>    | <i>Arabidopsis thaliana</i>    | U14174                  |
| <i>KNAT2</i>    | <i>Arabidopsis thaliana</i>    | U14175                  |
| <i>KNAT3</i>    | <i>Arabidopsis thaliana</i>    | X92392                  |
| <i>KNAT4</i>    | <i>Arabidopsis thaliana</i>    | X92393                  |
| <i>KNAT5</i>    | <i>Arabidopsis thaliana</i>    | NM119356                |
| <i>KNAT6S</i>   | <i>Arabidopsis thaliana</i>    | AB072361                |
| <i>KNAT7</i>    | <i>Arabidopsis thaliana</i>    | AF308451                |
| <i>LET12</i>    | <i>Solanum lycopersicum</i>    | AF000142                |
| <i>LET6</i>     | <i>Solanum lycopersicum</i>    | AF000141                |
| <i>LG3</i>      | <i>Zea mays</i>                | AF100455                |
| <i>MKN1-3</i>   | <i>Physcomitrella patens</i>   | AF285148                |
| <i>MKN2</i>     | <i>Physcomitrella patens</i>   | AF285147                |
| <i>MKN4</i>     | <i>Physcomitrella patens</i>   | AF284817                |
| <i>Mt KNOX1</i> | <i>Medicago trunculata</i>     | AF308454                |
| <i>NTH1</i>     | <i>Nicotiana tabacum</i>       | AB025573                |
| <i>NTH15</i>    | <i>Nicotiana tabacum</i>       | AB004785                |

Supplemental Table 4. (Continued).

| <b>Gene</b>     | <b>Species</b>                | <b>Accession Number</b> |
|-----------------|-------------------------------|-------------------------|
| <i>NTH20</i>    | <i>Nicotiana tabacum</i>      | AB025714                |
| <i>NTH22</i>    | <i>Nicotiana tabacum</i>      | AB025715                |
| <i>NTH23</i>    | <i>Nicotiana tabacum</i>      | AB004797                |
| <i>NTH9</i>     | <i>Nicotiana tabacum</i>      | AB025713                |
| <i>OSH1</i>     | <i>Oryza sativa</i>           | D16507                  |
| <i>OSH15</i>    | <i>Oryza sativa</i>           | AB016071                |
| <i>OSH3</i>     | <i>Oryza sativa</i>           | AB028882                |
| <i>OSH43</i>    | <i>Oryza sativa</i>           | AB028884                |
| <i>OSH45</i>    | <i>Oryza sativa</i>           | D49704                  |
| <i>OSH6</i>     | <i>Oryza sativa</i>           | AB028883                |
| <i>OSH71</i>    | <i>Oryza sativa</i>           | AB028885                |
| <i>Ph STM</i>   | <i>Petunia hybrida</i>        | AY112704                |
| <i>PKn1</i>     | <i>Ipomoea nil</i>            | AB015999                |
| <i>PKn2</i>     | <i>Ipomoea nil</i>            | AB016000                |
| <i>PKn3</i>     | <i>Ipomoea nil</i>            | AB016002                |
| <i>POTH1</i>    | <i>Solanum tuberosum</i>      | U65648                  |
| <i>Ra STM</i>   | <i>Ruscus aculeatus</i>       | AB300055                |
| <i>RS1</i>      | <i>Zea mays</i>               | L44133                  |
| <i>SBH1</i>     | <i>Glycine max</i>            | L13663                  |
| <i>Sk KNOX1</i> | <i>Selaginella kraussiana</i> | AY667449                |
| <i>Sk KNOX2</i> | <i>Selaginella kraussiana</i> | AY667450                |
| <i>SKN1</i>     | <i>Picea mariana</i>          | U90091                  |
| <i>SKN2</i>     | <i>Picea mariana</i>          | U90092                  |
| <i>Sr STM1</i>  | <i>Streptocarpus rexii</i>    | AY655753                |
| <i>Ss STM1</i>  | <i>Streptocarpus saxorum</i>  | AY655754                |
| <i>STM</i>      | <i>Arabidopsis thaliana</i>   | U32344                  |
| <i>THox2</i>    | <i>Solanum lycopersicum</i>   | U76410                  |
| <i>TKn1</i>     | <i>Solanum lycopersicum</i>   | U32247                  |
| <i>TKn2</i>     | <i>Solanum lycopersicum</i>   | U76407                  |
| <i>TKn3</i>     | <i>Solanum lycopersicum</i>   | U76408                  |
| <i>TKn4</i>     | <i>Solanum lycopersicum</i>   | AF533597                |
| <i>Wknox1</i>   | <i>Triticum aestivum</i>      | AB182943                |

Supplemental Table 5. Gene Accession Numbers for *WOX* Phylogeny.

| <b>Gene</b>     | <b>Species</b>              | <b>Accession Number</b> |
|-----------------|-----------------------------|-------------------------|
| Am <i>WUS</i>   | <i>Antirrhinum majus</i>    | AY162209                |
| Sl <i>WUS</i>   | <i>Solanum lycopersicum</i> | AJ538329                |
| Os <i>WOX5A</i> | <i>Oryza sativa</i>         | AM234751                |
| Os <i>WUS</i>   | <i>Oryza sativa</i>         | AM234746                |
| Ph <i>WUS</i>   | <i>Petunia x hybrida</i>    | AF481951                |
| Pt <i>WOX5A</i> | <i>Populus trichocarpa</i>  | AM234765                |
| Pt <i>WOX5B</i> | <i>Populus trichocarpa</i>  | AM234766                |
| <i>WOX1</i>     | <i>Arabidopsis thaliana</i> | NM112682                |
| <i>WOX10</i>    | <i>Arabidopsis thaliana</i> | NM101923                |
| <i>WOX11</i>    | <i>Arabidopsis thaliana</i> | AY251402                |
| <i>WOX12</i>    | <i>Arabidopsis thaliana</i> | NM121787                |
| <i>WOX13</i>    | <i>Arabidopsis thaliana</i> | NM119720                |
| <i>WOX14</i>    | <i>Arabidopsis thaliana</i> | NM101922                |
| <i>WOX2</i>     | <i>Arabidopsis thaliana</i> | NM125325                |
| <i>WOX3/PRS</i> | <i>Arabidopsis thaliana</i> | NM128422                |
| <i>WOX4</i>     | <i>Arabidopsis thaliana</i> | AY251396                |
| <i>WOX5</i>     | <i>Arabidopsis thaliana</i> | NM111961                |
| <i>WOX6</i>     | <i>Arabidopsis thaliana</i> | AY251399                |
| <i>WOX7</i>     | <i>Arabidopsis thaliana</i> | NM120659                |
| <i>WOX8</i>     | <i>Arabidopsis thaliana</i> | NM123966                |
| <i>WOX9</i>     | <i>Arabidopsis thaliana</i> | NM128948                |
| <i>WUS</i>      | <i>Arabidopsis thaliana</i> | NM127349                |
| Zm <i>WOX5A</i> | <i>Zea mays</i>             | AM234769                |
| Zm <i>WOX5B</i> | <i>Zea mays</i>             | AM234770                |
| Zm <i>WUS1</i>  | <i>Zea mays</i>             | AM234744                |
| Zm <i>WUS2</i>  | <i>Zea mays</i>             | AM234745                |

Supplemental Table 6. Gene Accession Numbers for *ARP* Phylogeny.

| <b>Gene</b>      | <b>Species</b>                                            | <b>Accession Number</b> |
|------------------|-----------------------------------------------------------|-------------------------|
| <i>AS1</i>       | <i>Arabidopsis thaliana</i>                               | AF175996                |
| <i>At MYB124</i> | <i>Arabidopsis thaliana</i>                               | AF371982                |
| <i>At MYB97</i>  | <i>Arabidopsis thaliana</i>                               | AF176002                |
| <i>Ec PHAN</i>   | <i>Eschscholzia californica</i> subsp. <i>californica</i> | AY228766                |
| <i>Gm PHANa</i>  | <i>Glycine max</i>                                        | AY790252                |
| <i>Gm PHANb</i>  | <i>Glycine max</i>                                        | AY790253                |
| <i>Hv GAMYB</i>  | <i>Hordeum vulgare</i> subsp. <i>vulgare</i>              | X87690                  |
| <i>Sl PHAN</i>   | <i>Solanum lycopersicum</i>                               | AF148934                |
| <i>Lj PHANa</i>  | <i>Lotus japonicus</i>                                    | AY790244                |
| <i>Lj PHANb</i>  | <i>Lotus japonicus</i>                                    | AY790245                |
| <i>Lt GAMYB</i>  | <i>Lolium temulentum</i>                                  | AF114162                |
| <i>Mt PHAN</i>   | <i>Medicago trunculata</i>                                | AF308453                |
| <i>Os GAMYB</i>  | <i>Oriza sativa</i>                                       | X98355                  |
| <i>Os RS2</i>    | <i>Oriza sativa</i>                                       | AB064519                |
| <i>PHAN</i>      | <i>Antirrhinum majus</i>                                  | AJ005586                |
| <i>Ps PHAN</i>   | <i>Pisum sativum</i>                                      | AF299140                |
| <i>RS2</i>       | <i>Zea mays</i>                                           | AF126489                |
| <i>Sk ARP</i>    | <i>Selaginella kraussiana</i>                             | AY667452                |
| <i>Sv ARP</i>    | <i>Selaginella viticulosa</i>                             | AY667453                |

Supplemental Table 7. Primers Used in This Study.

| Purpose                                                  | Primer set (F and R)                                                                              |
|----------------------------------------------------------|---------------------------------------------------------------------------------------------------|
| RT-PCR of Hj <i>STM</i>                                  | HjSTM-F2 (5'-GGAAGGCGGTTCCAATAGC-3') and HjSTM-R (5'-GTCGGCGACACGTCCATAGG-3')                     |
| probe for <i>in situ</i> hybridization of Hj <i>STM</i>  | HjSTM-F2 (5'-GGAAGGCGGTTCCAATAGC-3') and HjSTM-R2 (5'-CCAGCTCCGGTTGAGTTAG-3')                     |
| RT-PCR of Hj <i>WUS</i>                                  | HjWUS-F2 (5'-GCGATTCACCACCGATCCGC-3') and HjWUS-R (5'-GAGCGTCGTGTGACTGAGAG-3')                    |
| probe for <i>in situ</i> hybridization of Hj <i>WUS</i>  | HjWUS-F1 (5'-GGCCACAAATGAAGACAACG-3') and HjWUS-R (5'-GAGCGTCGTGTGACTGAGAG-3')                    |
| RT-PCR of Hj <i>PHAN</i>                                 | HjARP-F1 (5'-GAGAAGCAACACCGGCAGCA-3') and HjARP-R1 (5'-ATCCCGGCTGCATTCCAACA-3')                   |
| probe for <i>in situ</i> hybridization of Hj <i>PHAN</i> | HjARP-F (5'-GAGAGGCAGCGGTGGAGAAC-3') and HjARPR (5'-CACTGCCTTCGGGAGCTGATG-3')                     |
| RT-PCR of Hj <i>GAPDH</i>                                | HjGAPDH-F (5'-CCATCGCTGAATGGGAAGCTC-3') and HjGAPDH-R (5'-CTGAGCAGACGCCATGTGGAC-3')               |
| RT-PCR of Cd <i>STM</i>                                  | CdSTM-2F (5'-ATGGAAGGCGGTTCCAATAG-3') and CdSTM-2R (5'-ACTTCCCAGGTAGCCACTGT-3')                   |
| probe for <i>in situ</i> hybridization of Cd <i>STM</i>  | CdSTM-2F (5'-ATGGAAGGCGGTTCCAATAG-3') and CdSTM-2R (5'-ACTTCCCAGGTAGCCACTGT-3')                   |
| RT-PCR of Cd <i>WUS</i>                                  | CdWUS-2F (5'-GGCAAAAATGTGTTCTACTG-3') and CdWUS-2R (5'-CTTTTGACATCTTCGTTGTG-3')                   |
| RT-PCR of Cd <i>GAP</i>                                  | Cd13GAP-2F (5'-GAAAGGGGGAGCGAAAAAGG-3') and Cd13GAP-R (5'-CTGGGTAGAGGCCATGTGGA-3')                |
| probe for <i>in situ</i> hybridization of Tm <i>STM</i>  | GR 5' Nested Primer (5'-GGACTGACATGGACTGAAGGAGTA-3') and Podo-STM-Pn (5'-GACATGATCTTGGCYTTRAT-3') |
| probe for <i>in situ</i> hybridization of Tm <i>WUS</i>  | WUS-1-R (5'-GCATDGGRAADARDGGAAGHGT-3') and WUS-HD-Fn (5'-GGTTYCARAAYCAYAARGCNCG-3')               |

Supplemental Table 7. (Continued).

| Purpose                                        | Primer                              |
|------------------------------------------------|-------------------------------------|
| 1stPCR for isolating 3' ends of <i>STM</i>     | 5'- GGNWSYYTNAARCARGARTTYAT -3'     |
| 2nd PCR for isolating of 3' ends of <i>STM</i> | 5'- (CAU)4AARAARGGIAARYTNCC -3'     |
| 1stPCR for isolating 3'ends of <i>WUS</i>      | 5'- GGNAARATHGARGGNAARAAYGT -3'     |
| 2ndPCR for isolating 3'ends of <i>WUS</i>      | 5'- GGTTYCARAAYCAYAARGCNCG -3'      |
| 1st PCR for isolating 5'ends of <i>ARP</i>     | 5'- CAYAARAARGARGCNGCNTGG -3'       |
| 2nd PCR for isolating 5'ends of <i>ARP</i>     | 5'- GARAARATGGARGARATHGARGC -3'     |
| 1st PCR for isolating 3' ends of <i>GAPDH</i>  | 5'- ACNGAYAARGAYAARGCNGC -3'        |
| 2nd PCR for isolating 3' ends of <i>GAPDH</i>  | 5'- (CUA)4 AAYGAYGCNCCNATGTTYGT -3' |
